# Supplementary material
Source: publisher figshare collection journal article supplement (https://gsapubs.figshare.com/ndownloader/files/28496532)
Supplement: Supplementary file 1 [file 28496532]

## Sheet: GR_K(%)_LaLoutre1_Core_403_880m
Strat_LL1_core(m)	GR_K (%)
403.058	0.538283
403.158	0.506355
403.258	0.467278
403.358	0.396183
403.458	0.452781
403.558	0.388829
403.658	0.313664
403.758	0.358247
403.858	0.418037
403.958	0.456239
404.058	0.454898
404.158	0.499206
404.258	0.489166
404.358	0.473198
404.458	0.497477
404.558	0.497809
404.658	0.553279
404.758	0.604471
404.858	0.638692
404.958	0.617415
405.058	0.595753
405.158	0.634581
405.258	0.639939
405.358	0.562913
405.458	0.510642
405.558	0.514157
405.658	0.518409
405.758	0.486665
405.858	0.464446
405.958	0.434255
406.058	0.428585
406.158	0.483476
406.258	0.536761
406.358	0.553138
406.458	0.546752
406.558	0.55714
406.658	0.552816
406.758	0.474098
406.858	0.430681
406.958	0.463887
407.058	0.519614
407.158	0.538135
407.258	0.49269
407.358	0.474991
407.458	0.435131
407.558	0.361228
407.658	0.321892
407.758	0.343347
407.858	0.381723
407.958	0.401681
408.058	0.400714
408.158	0.382467
408.258	0.350809
408.358	0.309495
408.458	0.260707
408.558	0.20083
408.658	0.179286
408.758	0.229754
408.858	0.227651
408.958	0.223048
409.058	0.292025
409.158	0.410499
409.258	0.419902
409.358	0.383942
409.458	0.409277
409.558	0.4275
409.658	0.400544
409.758	0.373953
409.858	0.353231
409.958	0.349308
410.058	0.395852
410.158	0.449214
410.258	0.423452
410.358	0.381165
410.458	0.420448
410.558	0.487787
410.658	0.582236
410.758	0.541531
410.858	0.499902
410.958	0.541643
411.058	0.651434
411.158	0.607769
411.258	0.447137
411.358	0.388442
411.458	0.331639
411.558	0.296096
411.658	0.295284
411.758	0.320455
411.858	0.530996
411.958	0.466924
412.058	0.397172
412.158	0.414192
412.258	0.429341
412.358	0.441162
412.458	0.41905
412.558	0.451652
412.658	0.513577
412.758	0.526007
412.858	0.576051
412.958	0.538771
413.058	0.545086
413.158	0.462501
413.258	0.281496
413.358	0.236964
413.458	0.244687
413.558	0.208808
413.658	0.208142
413.758	0.208459
413.858	0.195603
413.958	0.230506
414.058	0.259579
414.158	0.297322
414.258	0.299183
414.358	0.328917
414.458	0.394444
414.558	0.342383
414.658	0.293016
414.758	0.303984
414.858	0.317416
414.958	0.300302
415.058	0.24564
415.158	0.223302
415.258	0.267162
415.358	0.267661
415.458	0.258402
415.558	0.318649
415.658	0.393186
415.758	0.474251
415.858	0.505926
415.958	0.61608
416.058	0.688118
416.158	0.710605
416.258	0.750137
416.358	0.725505
416.458	0.690654
416.558	0.624456
416.658	0.603478
416.758	0.6151
416.858	0.627371
416.958	0.702318
417.058	0.706206
417.158	0.676068
417.258	0.67449
417.358	0.608251
417.458	0.535243
417.558	0.451328
417.658	0.417097
417.758	0.385018
417.858	0.358895
417.958	0.355595
418.058	0.341288
418.158	0.336626
418.258	0.396007
418.358	0.510453
418.458	0.526616
418.558	0.488542
418.658	0.480946
418.758	0.512056
418.858	0.464041
418.958	0.348576
419.058	0.256824
419.158	0.209789
419.258	0.225698
419.358	0.257796
419.458	0.270016
419.558	0.231864
419.658	0.268228
419.758	0.315089
419.858	0.32161
419.958	0.27641
420.058	0.349724
420.158	0.468527
420.258	0.521254
420.358	0.545881
420.458	0.499806
420.558	0.4045
420.658	0.324795
420.758	0.303051
420.858	0.331575
420.958	0.390887
421.058	0.358625
421.158	0.374035
421.258	0.351643
421.358	0.365616
421.458	0.366212
421.558	0.342412
421.658	0.382342
421.758	0.405996
421.858	0.416974
421.958	0.445016
422.058	0.392212
422.158	0.34336
422.258	0.427807
422.358	0.574904
422.458	0.420723
422.558	0.463827
422.658	0.485397
422.758	0.49818
422.858	0.398036
422.958	0.340726
423.058	0.368625
423.158	0.301735
423.258	0.326659
423.358	0.372419
423.458	0.366193
423.558	0.466048
423.658	0.483897
423.758	0.493988
423.858	0.519502
423.958	0.541756
424.058	0.501181
424.158	0.518683
424.258	0.445556
424.358	0.407873
424.458	0.446375
424.558	0.432399
424.658	0.395653
424.758	0.38846
424.858	0.364529
424.958	0.352697
425.058	0.235408
425.158	0.152524
425.258	0.115765
425.358	0.0598246
425.458	0.0508217
425.558	0.121365
425.658	0.182857
425.758	0.304961
425.858	0.387706
425.958	0.406349
426.058	0.319823
426.158	0.275576
426.258	0.256855
426.358	0.187284
426.458	0.155413
426.558	0.200235
426.658	0.235584
426.758	0.242359
426.858	0.314368
426.958	0.349975
427.058	0.357524
427.158	0.305434
427.258	0.310323
427.358	0.307948
427.458	0.318945
427.558	0.394353
427.658	0.383095
427.758	0.41671
427.858	0.44291
427.958	0.412919
428.058	0.394914
428.158	0.29859
428.258	0.293222
428.358	0.340715
428.458	0.35199
428.558	0.385441
428.658	0.380342
428.758	0.370863
428.858	0.306972
428.958	0.181202
429.058	0.221036
429.158	0.467117
429.258	0.372443
429.358	0.326143
429.458	0.335424
429.558	0.451651
429.658	0.415524
429.758	0.490368
429.858	0.505003
429.958	0.570403
430.058	0.598816
430.158	0.554693
430.258	0.554273
430.358	0.493357
430.458	0.412667
430.558	0.28026
430.658	0.337083
430.758	0.30435
430.858	0.294544
430.958	0.355171
431.058	0.36465
431.158	0.308181
431.258	0.25581
431.358	0.292594
431.458	0.308547
431.558	0.268924
431.658	0.268946
431.758	0.345098
431.858	0.363143
431.958	0.41649
432.058	0.371168
432.158	0.409078
432.258	0.431402
432.358	0.36366
432.458	0.389022
432.558	0.297087
432.658	0.325396
432.758	0.278123
432.858	0.249477
432.958	0.306309
433.058	0.398692
433.158	0.360713
433.258	0.384316
433.358	0.416406
433.458	0.448031
433.558	0.443471
433.658	0.451382
433.758	0.497558
433.858	0.532401
433.958	0.576481
434.058	0.596029
434.158	0.562137
434.258	0.599901
434.358	0.656867
434.458	0.626753
434.558	0.620302
434.658	0.641885
434.758	0.717278
434.858	0.654106
434.958	0.545694
435.058	0.561125
435.158	0.491571
435.258	0.440872
435.358	0.358885
435.458	0.433078
435.558	0.452688
435.658	0.421546
435.758	0.316689
435.858	0.326337
435.958	0.307408
436.058	0.220536
436.158	0.181465
436.258	0.185291
436.358	0.175984
436.458	0.198425
436.558	0.245138
436.658	0.249073
436.758	0.21611
436.858	0.211482
436.958	0.255514
437.058	0.377525
437.158	0.390613
437.258	0.407565
437.358	0.466881
437.458	0.550654
437.558	0.623336
437.658	0.531049
437.758	0.600084
437.858	0.631196
437.958	0.715273
438.058	0.71164
438.158	0.646719
438.258	0.590411
438.358	0.529379
438.458	0.507861
438.558	0.449714
438.658	0.501261
438.758	0.655669
438.858	0.587513
438.958	0.549038
439.058	0.544351
439.158	0.582014
439.258	0.556003
439.358	0.458753
439.458	0.447637
439.558	0.42252
439.658	0.467226
439.758	0.512618
439.858	0.478715
439.958	0.530434
440.058	0.550938
440.158	0.549506
440.258	0.479339
440.358	0.373544
440.458	0.364369
440.558	0.339121
440.658	0.415944
440.758	0.473811
440.858	0.504829
440.958	0.491177
441.058	0.47941
441.158	0.478852
441.258	0.393866
441.358	0.410349
441.458	0.355924
441.558	0.347776
441.658	0.276524
441.758	0.16238
441.858	0.181786
441.958	0.179363
442.058	0.166404
442.158	0.188929
442.258	0.300138
442.358	0.443273
442.458	0.464852
442.558	0.513307
442.658	0.521915
442.758	0.526803
442.858	0.463319
442.958	0.405226
443.058	0.341341
443.158	0.35735
443.258	0.437162
443.358	0.592126
443.458	0.734141
443.558	0.735035
443.658	0.900476
443.758	0.865697
443.858	0.867707
443.958	0.833153
444.058	0.757035
444.158	0.754758
444.258	0.659395
444.358	0.666826
444.458	0.654483
444.558	0.630619
444.658	0.680235
444.758	0.723395
444.858	0.717601
444.958	0.635428
445.058	0.644269
445.158	0.658214
445.258	0.609577
445.358	0.563792
445.458	0.61081
445.558	0.603669
445.658	0.61587
445.758	0.49289
445.858	0.398466
445.958	0.251633
446.058	0.199862
446.158	0.233607
446.258	0.240215
446.358	0.229401
446.458	0.205808
446.558	0.271472
446.658	0.244075
446.758	0.237018
446.858	0.245708
446.958	0.285107
447.058	0.327696
447.158	0.359931
447.258	0.431549
447.358	0.513105
447.458	0.501371
447.558	0.441755
447.658	0.388065
447.758	0.404516
447.858	0.344951
447.958	0.345353
448.058	0.396061
448.158	0.42098
448.258	0.42762
448.358	0.436304
448.458	0.482123
448.558	0.478482
448.658	0.470775
448.758	0.476988
448.858	0.52482
448.958	0.575156
449.058	0.655131
449.158	0.728267
449.258	0.83055
449.358	0.678391
449.458	0.760731
449.558	0.718255
449.658	0.653393
449.758	0.612186
449.858	0.642363
449.958	0.5816
450.058	0.490874
450.158	0.493864
450.258	0.505943
450.358	0.498649
450.458	0.444883
450.558	0.431489
450.658	0.488275
450.758	0.485895
450.858	0.416408
450.958	0.390702
451.058	0.423607
451.158	0.479639
451.258	0.431794
451.358	0.40253
451.458	0.428516
451.558	0.466496
451.658	0.488039
451.758	0.443127
451.858	0.471837
451.958	0.495937
452.058	0.549951
452.158	0.541482
452.258	0.461839
452.358	0.389275
452.458	0.244332
452.558	0.231871
452.658	0.204053
452.758	0.274855
452.858	0.24292
452.958	0.229334
453.058	0.268825
453.158	0.246009
453.258	0.680726
453.358	0.079868
453.458	0.0371947
453.558	0.1068
453.658	0.145365
453.758	0.178774
453.858	0.225523
453.958	0.282999
454.058	0.295068
454.158	0.324593
454.258	0.284935
454.358	0.285654
454.458	0.296424
454.558	0.309899
454.658	0.257674
454.758	0.21276
454.858	0.264619
454.958	0.278301
455.058	0.348851
455.158	0.420656
455.258	0.494234
455.358	0.495623
455.458	0.500361
455.558	0.58276
455.658	0.618913
455.758	0.642083
455.858	0.619767
455.958	0.593874
456.058	0.670772
456.158	0.789762
456.258	0.670247
456.358	0.681946
456.458	0.611939
456.558	0.612057
456.658	0.536344
456.758	0.440885
456.858	0.473995
456.958	0.40629
457.058	0.33015
457.158	0.431694
457.258	0.451144
457.358	0.454414
457.458	0.503473
457.558	0.59147
457.658	0.673737
457.758	0.569356
457.858	0.581702
457.958	0.633233
458.058	0.555615
458.158	0.388038
458.258	0.359244
458.358	0.358341
458.458	0.324385
458.558	0.327656
458.658	0.365838
458.758	0.483988
458.858	0.553375
458.958	0.59849
459.058	0.624191
459.158	0.57903
459.258	0.557525
459.358	0.560065
459.458	0.638552
459.558	0.491839
459.658	0.433507
459.758	0.406927
459.858	0.449041
459.958	0.477439
460.058	0.469206
460.158	0.551443
460.258	0.55592
460.358	0.530747
460.458	0.454712
460.558	0.392772
460.658	0.416152
460.758	0.347018
460.858	0.3958
460.958	0.442316
461.058	0.511956
461.158	0.49381
461.258	0.830055
461.358	0.548324
461.458	0.499922
461.558	0.580643
461.658	0.604547
461.758	0.676761
461.858	0.728567
461.958	0.724596
462.058	0.802238
462.158	0.780366
462.258	0.813689
462.358	0.752172
462.458	0.716935
462.558	0.75229
462.658	0.714539
462.758	0.662459
462.858	0.636974
462.958	0.711854
463.058	0.650132
463.158	0.608722
463.258	0.624809
463.358	0.498441
463.458	0.432668
463.558	0.463133
463.658	0.433937
463.758	0.44481
463.858	0.385923
463.958	0.494946
464.058	0.657531
464.158	0.560413
464.258	0.577505
464.358	0.541219
464.458	0.531619
464.558	0.48469
464.658	0.399544
464.758	0.416171
464.858	0.416896
464.958	0.478497
465.058	0.421604
465.158	0.4512
465.258	0.42366
465.358	0.460941
465.458	0.437785
465.558	0.476013
465.658	0.459784
465.758	0.469764
465.858	0.405676
465.958	0.354442
466.058	0.320934
466.158	0.200626
466.258	0.165175
466.358	0.120482
466.458	0.221231
466.558	0.247088
466.658	0.276212
466.758	0.357898
466.858	0.36994
466.958	0.435075
467.058	0.414219
467.158	0.434406
467.258	0.417832
467.358	0.342394
467.458	0.392354
467.558	0.429574
467.658	0.41118
467.758	0.50678
467.858	0.560185
467.958	0.731533
468.058	0.828982
468.158	0.873074
468.258	0.866491
468.358	0.688644
468.458	0.700695
468.558	0.609629
468.658	0.543826
468.758	0.582454
468.858	0.647156
468.958	0.744472
469.058	0.742904
469.158	0.728043
469.258	0.695995
469.358	0.549919
469.458	0.587237
469.558	0.543303
469.658	0.435426
469.758	0.436613
469.858	0.526582
469.958	0.508884
470.058	0.522546
470.158	0.47453
470.258	0.57811
470.358	0.61484
470.458	0.574867
470.558	0.691475
470.658	0.679969
470.758	0.805898
470.858	0.771258
470.958	0.783695
471.058	0.787101
471.158	0.716237
471.258	0.657014
471.358	0.590303
471.458	0.5174
471.558	0.58823
471.658	0.504711
471.758	0.45799
471.858	0.40388
471.958	0.35058
472.058	0.308009
472.158	0.224867
472.258	0.203712
472.358	0.278941
472.458	0.321087
472.558	0.341911
472.658	0.340661
472.758	0.333153
472.858	0.335632
472.958	0.272431
473.058	0.216621
473.158	0.244629
473.258	0.230561
473.358	0.272223
473.458	0.320061
473.558	0.394377
473.658	0.506432
473.758	0.46605
473.858	0.624389
473.958	0.647207
474.058	0.654711
474.158	0.722447
474.258	0.814251
474.358	0.889191
474.458	0.837819
474.558	0.890834
474.658	0.929566
474.758	0.897817
474.858	0.816179
474.958	0.676667
475.058	0.609795
475.158	0.607341
475.258	0.462642
475.358	0.532206
475.458	0.510383
475.558	0.494983
475.658	0.447146
475.758	0.457545
475.858	0.436128
475.958	0.400793
476.058	0.396114
476.158	0.459794
476.258	0.447551
476.358	0.389077
476.458	0.372244
476.558	0.375989
476.658	0.29539
476.758	0.294209
476.858	0.380347
476.958	0.406909
477.058	0.428275
477.158	0.372662
477.258	0.413212
477.358	0.395123
477.458	0.307621
477.558	0.258418
477.658	0.302303
477.758	0.359667
477.858	0.322312
477.958	0.282833
478.058	0.27416
478.158	0.290351
478.258	0.271056
478.358	0.286076
478.458	0.275537
478.558	0.264656
478.658	0.246837
478.758	0.256161
478.858	0.312367
478.958	0.349601
479.058	0.353652
479.158	0.353744
479.258	0.356826
479.358	0.369945
479.458	0.34021
479.558	0.329885
479.658	0.371446
479.758	0.423717
479.858	0.505063
479.958	0.598455
480.058	0.618782
480.158	0.659078
480.258	0.641909
480.358	0.62333
480.458	0.551803
480.558	0.481347
480.658	0.560551
480.758	0.606314
480.858	0.633307
480.958	0.599744
481.058	0.60878
481.158	0.653072
481.258	0.575818
481.358	0.46791
481.458	0.463274
481.558	0.39092
481.658	0.398185
481.758	0.385062
481.858	0.383339
481.958	0.335129
482.058	0.286418
482.158	0.362491
482.258	0.379166
482.358	0.403848
482.458	0.457233
482.558	0.655328
482.658	0.749174
482.758	0.720367
482.858	0.658138
482.958	0.654296
483.058	0.697662
483.158	0.621185
483.258	0.498773
483.358	0.507395
483.458	0.549636
483.558	0.565052
483.658	0.510427
483.758	0.410716
483.858	0.448154
483.958	0.464674
484.058	0.454182
484.158	0.425519
484.258	0.423548
484.358	0.428625
484.458	0.37154
484.558	0.378658
484.658	0.405813
484.758	0.466125
484.858	0.478027
484.958	0.493148
485.058	0.545619
485.158	0.540416
485.258	0.521016
485.358	0.459196
485.458	0.440652
485.558	0.426895
485.658	0.374084
485.758	0.386862
485.858	0.342819
485.958	0.306429
486.058	0.293313
486.158	0.334748
486.258	0.374025
486.358	0.356832
486.458	0.333472
486.558	0.393933
486.658	0.458685
486.758	0.445812
486.858	0.420473
486.958	0.473395
487.058	0.577826
487.158	0.57355
487.258	0.558347
487.358	0.616195
487.458	0.667464
487.558	0.678503
487.658	0.679827
487.758	0.726566
487.858	0.755597
487.958	0.682971
488.058	0.569327
488.158	0.492134
488.258	0.424117
488.358	0.375684
488.458	0.37553
488.558	0.394469
488.658	0.47656
488.758	0.570437
488.858	0.626755
488.958	0.646811
489.058	0.693013
489.158	0.715192
489.258	0.69862
489.358	0.658989
489.458	0.660756
489.558	0.608175
489.658	0.579054
489.758	0.551428
489.858	0.603337
489.958	0.663138
490.058	0.779435
490.158	0.814624
490.258	0.759794
490.358	0.751532
490.458	0.755095
490.558	0.628
490.658	0.453786
490.758	0.411665
490.858	0.356506
490.958	0.366924
491.058	0.367593
491.158	0.406496
491.258	0.416931
491.358	0.459861
491.458	0.432292
491.558	0.33246
491.658	0.446653
491.758	0.394717
491.858	0.506533
491.958	0.636628
492.058	0.517486
492.158	0.5055
492.258	0.479446
492.358	0.448489
492.458	0.443692
492.558	0.488511
492.658	0.469212
492.758	0.470164
492.858	0.435778
492.958	0.357653
493.058	0.341802
493.158	0.394486
493.258	0.466869
493.358	0.500731
493.458	0.540242
493.558	0.572396
493.658	0.536731
493.758	0.487424
493.858	0.434621
493.958	0.346233
494.058	0.397115
494.158	0.523465
494.258	0.537417
494.358	0.477974
494.458	0.478461
494.558	0.524402
494.658	0.496974
494.758	0.399038
494.858	0.399568
494.958	0.511631
495.058	0.550285
495.158	0.546371
495.258	0.519461
495.358	0.592726
495.458	0.625763
495.558	0.531641
495.658	0.540261
495.758	0.580905
495.858	0.572526
495.958	0.523251
496.058	0.538233
496.158	0.623076
496.258	0.607295
496.358	0.654313
496.458	0.775994
496.558	0.803919
496.658	0.762308
496.758	0.733643
496.858	0.802333
496.958	0.73655
497.058	0.678729
497.158	0.675576
497.258	0.692741
497.358	0.692997
497.458	0.642762
497.558	0.541755
497.658	0.540253
497.758	0.48609
497.858	0.498283
497.958	0.49533
498.058	0.425811
498.158	0.424144
498.258	0.431942
498.358	0.545799
498.458	0.552431
498.558	0.524296
498.658	0.495432
498.758	0.433116
498.858	0.323369
498.958	0.283777
499.058	0.258834
499.158	0.297992
499.258	0.423285
499.358	0.56105
499.458	0.669036
499.558	0.746091
499.658	0.80227
499.758	0.859997
499.858	0.824269
499.958	0.751383
500.058	0.714309
500.158	0.615378
500.258	0.507152
500.358	0.471588
500.458	0.428099
500.558	0.454073
500.658	0.576545
500.758	0.646383
500.858	0.686299
500.958	0.679923
501.058	0.691212
501.158	0.681596
501.258	0.644755
501.358	0.60561
501.458	0.605538
501.558	0.69101
501.658	0.79902
501.758	0.769045
501.858	0.739237
501.958	0.829489
502.058	0.854274
502.158	0.68662
502.258	0.663666
502.358	0.75196
502.458	0.744847
502.558	0.75194
502.658	0.686129
502.758	0.755206
502.858	0.760373
502.958	0.717217
503.058	0.538071
503.158	0.557634
503.258	0.649018
503.358	0.727356
503.458	0.752815
503.558	0.711375
503.658	0.791463
503.758	0.864454
503.858	0.910332
503.958	0.879684
504.058	0.569656
504.158	0.755397
504.258	0.642491
504.358	0.487008
504.458	0.552505
504.558	0.450588
504.658	0.377502
504.758	0.399212
504.858	0.435142
504.958	0.472608
505.058	0.49105
505.158	0.597816
505.258	0.634605
505.358	0.606633
505.458	0.476084
505.558	0.393002
505.658	0.450086
505.758	0.376723
505.858	0.387708
505.958	0.371011
506.058	0.492596
506.158	0.434602
506.258	0.354372
506.358	0.450119
506.458	0.506465
506.558	0.576741
506.658	0.56463
506.758	0.632577
506.858	0.696137
506.958	0.783566
507.058	0.791737
507.158	0.764846
507.258	0.782589
507.358	0.895265
507.458	0.977885
507.558	0.906458
507.658	0.860598
507.758	0.773333
507.858	0.888377
507.958	0.822158
508.058	0.85955
508.158	0.902242
508.258	0.909408
508.358	0.931044
508.458	0.808316
508.558	0.68507
508.658	0.566104
508.758	0.403831
508.858	0.389152
508.958	0.489829
509.058	0.562567
509.158	0.541975
509.258	0.601669
509.358	0.576179
509.458	0.564823
509.558	0.578515
509.658	0.591327
509.758	0.643917
509.858	0.703426
509.958	0.744202
510.058	0.815497
510.158	0.857321
510.258	0.982948
510.358	0.925048
510.458	0.883664
510.558	0.91109
510.658	0.880162
510.758	0.713248
510.858	0.686567
510.958	0.769335
511.058	0.772042
511.158	0.765567
511.258	0.823336
511.358	0.778478
511.458	0.75984
511.558	0.798691
511.658	0.763565
511.758	0.704177
511.858	0.635298
511.958	0.687741
512.058	0.719956
512.158	0.656395
512.258	0.752962
512.358	0.840394
512.458	0.914146
512.558	0.764626
512.658	0.693717
512.758	0.629174
512.858	0.53635
512.958	0.518226
513.058	0.53362
513.158	0.557057
513.258	0.599647
513.358	0.578773
513.458	0.661567
513.558	0.628953
513.658	0.635213
513.758	0.626639
513.858	0.518616
513.958	0.510385
514.058	0.380759
514.158	0.351931
514.258	0.338706
514.358	0.345713
514.458	0.461762
514.558	0.509391
514.658	0.580776
514.758	0.517376
514.858	0.468475
514.958	0.434485
515.058	0.369746
515.158	0.29654
515.258	0.265598
515.358	0.371576
515.458	0.500103
515.558	0.590362
515.658	0.772115
515.758	0.64424
515.858	0.627713
515.958	0.571813
516.058	0.449578
516.158	0.412666
516.258	0.421613
516.358	0.529016
516.458	0.520282
516.558	0.559097
516.658	0.682499
516.758	0.72085
516.858	0.714228
516.958	0.646638
517.058	0.681019
517.158	0.658341
517.258	0.67779
517.358	0.730219
517.458	0.790718
517.558	0.808983
517.658	0.8664
517.758	0.900493
517.858	0.783973
517.958	0.760446
518.058	0.766814
518.158	0.704789
518.258	0.649312
518.358	0.579848
518.458	0.625874
518.558	0.565165
518.658	0.552427
518.758	0.599123
518.858	0.589357
518.958	0.534971
519.058	0.455486
519.158	0.447807
519.258	0.362408
519.358	0.278707
519.458	0.233804
519.558	0.358494
519.658	0.392998
519.758	0.396822
519.858	0.364973
519.958	0.387916
520.058	0.433552
520.158	0.348337
520.258	0.376105
520.358	0.44507
520.458	0.513143
520.558	0.534317
520.658	0.613174
520.758	0.601454
520.858	0.663288
520.958	0.711892
521.058	0.725006
521.158	0.822958
521.258	0.785203
521.358	0.806604
521.458	0.787077
521.558	0.737948
521.658	0.881519
521.758	0.920561
521.858	0.907755
521.958	0.909153
522.058	0.935676
522.158	0.944148
522.258	0.956445
522.358	0.889899
522.458	0.877973
522.558	0.947315
522.658	0.916949
522.758	0.933877
522.858	0.838324
522.958	0.779411
523.058	0.718773
523.158	0.689948
523.258	0.733595
523.358	0.599362
523.458	0.596178
523.558	0.635707
523.658	0.698653
523.758	0.676989
523.858	0.574644
523.958	0.622794
524.058	0.636568
524.158	0.689637
524.258	0.681143
524.358	0.615227
524.458	0.594954
524.558	0.61294
524.658	0.64169
524.758	0.662416
524.858	0.756761
524.958	0.689451
525.058	0.620506
525.158	0.596157
525.258	0.551269
525.358	0.494871
525.458	0.426089
525.558	0.467835
525.658	0.651543
525.758	0.629655
525.858	0.564698
525.958	0.554425
526.058	0.531458
526.158	0.483476
526.258	0.340502
526.358	0.336345
526.458	0.353976
526.558	0.331095
526.658	0.377229
526.758	0.43752
526.858	0.532581
526.958	0.589905
527.058	0.51571
527.158	0.568384
527.258	0.601816
527.358	0.609521
527.458	0.562833
527.558	0.488766
527.658	0.51485
527.758	0.430998
527.858	0.339686
527.958	0.291249
528.058	0.262435
528.158	0.31837
528.258	0.336369
528.358	0.384966
528.458	0.315369
528.558	0.389781
528.658	0.40292
528.758	0.42368
528.858	0.537735
528.958	0.591766
529.058	0.75564
529.158	0.877406
529.258	0.84003
529.358	0.880069
529.458	0.798156
529.558	0.830181
529.658	0.768693
529.758	0.759671
529.858	0.94179
529.958	0.893105
530.058	0.84795
530.158	0.802564
530.258	0.746654
530.358	0.792691
530.458	0.720852
530.558	0.76151
530.658	0.878148
530.758	0.863745
530.858	0.862196
530.958	0.82829
531.058	0.855419
531.158	0.801418
531.258	0.762477
531.358	0.786044
531.458	0.776665
531.558	0.768649
531.658	0.656466
531.758	0.670369
531.858	0.668958
531.958	0.562336
532.058	0.497014
532.158	0.471561
532.258	0.459586
532.358	0.427861
532.458	0.372975
532.558	0.418822
532.658	0.524361
532.758	0.546239
532.858	0.549475
532.958	0.494186
533.058	0.517462
533.158	0.553083
533.258	0.510469
533.358	0.429334
533.458	0.428242
533.558	0.449439
533.658	0.493224
533.758	0.540548
533.858	0.540264
533.958	0.58409
534.058	0.627207
534.158	0.668366
534.258	0.659222
534.358	0.581351
534.458	0.547999
534.558	0.483983
534.658	0.562366
534.758	0.540125
534.858	0.510116
534.958	0.43575
535.058	0.550328
535.158	0.56737
535.258	0.418523
535.358	0.429698
535.458	0.374398
535.558	0.494695
535.658	0.500543
535.758	0.500584
535.858	0.601717
535.958	0.65179
536.058	0.674954
536.158	0.529717
536.258	0.433612
536.358	0.51226
536.458	0.580597
536.558	0.521855
536.658	0.550352
536.758	0.638504
536.858	0.683461
536.958	0.676493
537.058	0.608289
537.158	0.677628
537.258	0.650109
537.358	0.616538
537.458	0.593021
537.558	0.642245
537.658	0.656549
537.758	0.704146
537.858	0.809853
537.958	0.881359
538.058	0.948298
538.158	0.906458
538.258	0.906487
538.358	0.812988
538.458	0.804218
538.558	0.767013
538.658	0.691936
538.758	0.664892
538.858	0.620666
538.958	0.637002
539.058	0.60341
539.158	0.581746
539.258	0.592937
539.358	0.592129
539.458	0.65363
539.558	0.652544
539.658	0.660932
539.758	0.666402
539.858	0.649877
539.958	0.661388
540.058	0.625517
540.158	0.592457
540.258	0.525417
540.358	0.479399
540.458	0.51864
540.558	0.502276
540.658	0.548616
540.758	0.541085
540.858	0.585805
540.958	0.627424
541.058	0.608249
541.158	0.571556
541.258	0.509495
541.358	0.48899
541.458	0.466736
541.558	0.437741
541.658	0.482178
541.758	0.499616
541.858	0.479481
541.958	0.448318
542.058	0.487366
542.158	0.464008
542.258	0.388169
542.358	0.401701
542.458	0.472943
542.558	0.531309
542.658	0.511297
542.758	0.482854
542.858	0.503428
542.958	0.573373
543.058	0.544571
543.158	0.476621
543.258	0.459613
543.358	0.518447
543.458	0.593594
543.558	0.545504
543.658	0.607778
543.758	0.778383
543.858	0.837727
543.958	0.867352
544.058	0.865811
544.158	0.888046
544.258	0.841081
544.358	0.807952
544.458	0.781989
544.558	0.746841
544.658	0.846241
544.758	0.828299
544.858	0.71941
544.958	0.568242
545.058	0.626986
545.158	0.706875
545.258	0.714636
545.358	0.688541
545.458	0.719202
545.558	0.717592
545.658	0.668557
545.758	0.633819
545.858	0.637039
545.958	0.616059
546.058	0.619666
546.158	0.664686
546.258	0.758479
546.358	0.841566
546.458	0.821508
546.558	0.832608
546.658	0.883439
546.758	0.870514
546.858	0.818709
546.958	0.762161
547.058	0.703013
547.158	0.697132
547.258	0.724693
547.358	0.732476
547.458	0.708357
547.558	0.726194
547.658	0.832074
547.758	0.900154
547.858	0.852093
547.958	0.791432
548.058	0.826901
548.158	0.77708
548.258	0.708625
548.358	0.656236
548.458	0.660921
548.558	0.64332
548.658	0.65238
548.758	0.752072
548.858	0.835158
548.958	0.829352
549.058	0.85084
549.158	0.94697
549.258	0.943484
549.358	0.925772
549.458	0.912577
549.558	0.940008
549.658	0.928649
549.758	0.897084
549.858	0.831908
549.958	0.766785
550.058	0.73331
550.158	0.662604
550.258	0.598497
550.358	0.550723
550.458	0.586717
550.558	0.598787
550.658	0.597434
550.758	0.636827
550.858	0.651189
550.958	0.640945
551.058	0.590665
551.158	0.526275
551.258	0.509124
551.358	0.502943
551.458	0.490903
551.558	0.561264
551.658	0.628206
551.758	0.615809
551.858	0.550537
551.958	0.583177
552.058	0.666147
552.158	0.664007
552.258	0.660491
552.358	0.722566
552.458	0.773262
552.558	0.724908
552.658	0.638216
552.758	0.563701
552.858	0.55644
552.958	0.612004
553.058	0.664897
553.158	0.572949
553.258	0.523606
553.358	0.490571
553.458	0.489511
553.558	0.452888
553.658	0.395297
553.758	0.411488
553.858	0.419268
553.958	0.489028
554.058	0.564735
554.158	0.646529
554.258	0.683802
554.358	0.744176
554.458	0.808223
554.558	0.789344
554.658	0.764096
554.758	0.731029
554.858	0.825442
554.958	0.884622
555.058	0.898608
555.158	0.878061
555.258	0.866242
555.358	0.846785
555.458	0.744566
555.558	0.681659
555.658	0.705343
555.758	0.710551
555.858	0.65893
555.958	0.612748
556.058	0.624561
556.158	0.621144
556.258	0.626746
556.358	0.698935
556.458	0.728054
556.558	0.6958
556.658	0.678484
556.758	0.745008
556.858	0.74969
556.958	0.74843
557.058	0.783662
557.158	0.812497
557.258	0.790521
557.358	0.748545
557.458	0.75247
557.558	0.662572
557.658	0.565972
557.758	0.560499
557.858	0.588743
557.958	0.544281
558.058	0.496972
558.158	0.574088
558.258	0.544015
558.358	0.49942
558.458	0.433369
558.558	0.409713
558.658	0.387219
558.758	0.385211
558.858	0.445339
558.958	0.50526
559.058	0.56834
559.158	0.569499
559.258	0.662301
559.358	0.677663
559.458	0.708547
559.558	0.650928
559.658	0.554378
559.758	0.552606
559.858	0.577574
559.958	0.571877
560.058	0.563039
560.158	0.627474
560.258	0.727741
560.358	0.745753
560.458	0.59743
560.558	0.56566
560.658	0.646203
560.758	0.596194
560.858	0.539653
560.958	0.549402
561.058	0.611659
561.158	0.62267
561.258	0.64901
561.358	0.655322
561.458	0.653301
561.558	0.644501
561.658	0.642791
561.758	0.669359
561.858	0.696935
561.958	0.694178
562.058	0.723563
562.158	0.77746
562.258	0.806567
562.358	0.841569
562.458	0.879274
562.558	0.927177
562.658	0.878321
562.758	0.821562
562.858	0.964706
562.958	0.97738
563.058	0.98191
563.158	0.928858
563.258	0.937379
563.358	0.9803
563.458	1.06483
563.558	1.04143
563.658	0.901688
563.758	0.972208
563.858	0.863445
563.958	0.849635
564.058	0.712894
564.158	0.645027
564.258	0.766594
564.358	0.75635
564.458	0.797954
564.558	0.767143
564.658	0.851107
564.758	0.930066
564.858	0.851089
564.958	0.839761
565.058	0.794364
565.158	0.815382
565.258	0.894239
565.358	0.899028
565.458	0.849497
565.558	0.848161
565.658	0.936571
565.758	0.925661
565.858	0.917277
565.958	0.904401
566.058	0.916193
566.158	0.88099
566.258	0.821425
566.358	0.795195
566.458	0.761851
566.558	0.836108
566.658	0.910623
566.758	0.970903
566.858	0.954003
566.958	0.934165
567.058	0.863529
567.158	0.730384
567.258	0.637416
567.358	0.602248
567.458	0.578904
567.558	0.491245
567.658	0.445036
567.758	0.444949
567.858	0.410176
567.958	0.349249
568.058	0.331543
568.158	0.391482
568.258	0.489922
568.358	0.548429
568.458	0.564935
568.558	0.649676
568.658	0.734233
568.758	0.715751
568.858	0.662726
568.958	0.646179
569.058	0.684677
569.158	0.662584
569.258	0.653299
569.358	0.785828
569.458	0.860889
569.558	0.876273
569.658	0.889351
569.758	0.896207
569.858	0.964263
569.958	0.954247
570.058	0.89626
570.158	0.901821
570.258	0.937804
570.358	0.980559
570.458	0.900904
570.558	0.77931
570.658	0.77405
570.758	0.833675
570.858	0.911747
570.958	0.946853
571.058	1.01606
571.158	1.09027
571.258	1.18376
571.358	1.16467
571.458	1.06617
571.558	1.01043
571.658	0.986019
571.758	0.981524
571.858	0.950954
571.958	0.84837
572.058	0.720137
572.158	0.654137
572.258	0.628686
572.358	0.682002
572.458	0.674076
572.558	0.799398
572.658	0.925291
572.758	0.91115
572.858	0.875097
572.958	0.722282
573.058	0.640852
573.158	0.551919
573.258	0.502011
573.358	0.541713
573.458	0.525967
573.558	0.563636
573.658	0.683322
573.758	0.785715
573.858	0.843468
573.958	0.807384
574.058	0.795265
574.158	0.805622
574.258	0.738333
574.358	0.688991
574.458	0.684392
574.558	0.72969
574.658	0.742848
574.758	0.682631
574.858	0.74877
574.958	0.754876
575.058	0.690267
575.158	0.644635
575.258	0.62398
575.358	0.667406
575.458	0.667112
575.558	0.663705
575.658	0.694156
575.758	0.741244
575.858	0.736914
575.958	0.676664
576.058	0.596301
576.158	0.605182
576.258	0.663131
576.358	0.598633
576.458	0.592183
576.558	0.754042
576.658	0.863186
576.758	0.851017
576.858	0.835286
576.958	0.860967
577.058	0.922682
577.158	0.904222
577.258	0.884177
577.358	0.967473
577.458	1.00251
577.558	1.06134
577.658	1.064
577.758	1.07058
577.858	1.08582
577.958	1.00467
578.058	0.977017
578.158	0.969997
578.258	0.982031
578.358	0.953819
578.458	0.887618
578.558	0.87926
578.658	0.860238
578.758	0.843004
578.858	0.791499
578.958	0.796925
579.058	0.827066
579.158	0.845282
579.258	0.987705
579.358	1.03533
579.458	1.00679
579.558	1.0491
579.658	1.09133
579.758	0.99227
579.858	0.85872
579.958	0.827573
580.058	0.909464
580.158	0.904624
580.258	0.95215
580.358	0.98115
580.458	0.935142
580.558	0.893121
580.658	0.868177
580.758	0.835645
580.858	0.728189
580.958	0.664318
581.058	0.653714
581.158	0.656304
581.258	0.629755
581.358	0.620045
581.458	0.69565
581.558	0.798609
581.658	0.80798
581.758	0.782233
581.858	0.676265
581.958	0.653711
582.058	0.60469
582.158	0.576594
582.258	0.563973
582.358	0.561667
582.458	0.720483
582.558	0.817349
582.658	0.910806
582.758	0.926416
582.858	1.02485
582.958	1.0868
583.058	1.0395
583.158	1.01032
583.258	0.922322
583.358	0.929103
583.458	0.864497
583.558	0.783118
583.658	0.759109
583.758	0.87056
583.858	0.944942
583.958	0.964359
584.058	0.990187
584.158	1.08081
584.258	1.05331
584.358	0.938601
584.458	0.917776
584.558	0.878632
584.658	0.833573
584.758	0.78386
584.858	0.822367
584.958	0.866283
585.058	0.863171
585.158	0.886697
585.258	0.998559
585.358	1.02807
585.458	0.987432
585.558	0.922434
585.658	0.8302
585.758	0.822322
585.858	0.789404
585.958	0.809907
586.058	0.834544
586.158	0.946571
586.258	1.02513
586.358	0.920931
586.458	0.879379
586.558	0.832357
586.658	0.857081
586.758	0.844806
586.858	0.896506
586.958	1.05972
587.058	1.15956
587.158	1.1777
587.258	1.13663
587.358	1.16925
587.458	1.13379
587.558	1.1515
587.658	1.1043
587.758	1.10139
587.858	1.17236
587.958	1.13507
588.058	1.13532
588.158	1.17254
588.258	1.1989
588.358	1.23291
588.458	1.22746
588.558	1.25033
588.658	1.229
588.758	1.22289
588.858	1.32383
588.958	1.21943
589.058	1.10497
589.158	1.11698
589.258	1.16333
589.358	1.13092
589.458	1.03086
589.558	1.19754
589.658	1.33717
589.758	1.38539
589.858	1.3929
589.958	1.35901
590.058	1.36503
590.158	1.49324
590.258	1.56699
590.358	1.40044
590.458	1.32485
590.558	1.28175
590.658	1.26416
590.758	1.22259
590.858	1.21207
590.958	1.22938
591.058	1.21557
591.158	1.13725
591.258	1.09581
591.358	1.01899
591.458	0.927542
591.558	0.846314
591.658	0.805758
591.758	0.921041
591.858	0.994245
591.958	1.08238
592.058	1.0529
592.158	0.951285
592.258	0.977164
592.358	0.956876
592.458	0.862699
592.558	0.782207
592.658	0.710346
592.758	0.778652
592.858	0.765973
592.958	0.755887
593.058	0.71911
593.158	0.687718
593.258	0.723481
593.358	0.700629
593.458	0.694865
593.558	0.74609
593.658	0.894251
593.758	0.941612
593.858	0.995387
593.958	1.10353
594.058	1.15972
594.158	1.15804
594.258	1.12929
594.358	1.23618
594.458	1.22487
594.558	1.14565
594.658	1.17555
594.758	1.2526
594.858	1.29298
594.958	1.2256
595.058	1.24802
595.158	1.21456
595.258	1.14377
595.358	1.14902
595.458	1.21264
595.558	1.29139
595.658	1.33613
595.758	1.35251
595.858	1.32674
595.958	1.17
596.058	1.04291
596.158	0.988229
596.258	0.883421
596.358	0.987943
596.458	0.948796
596.558	1.02446
596.658	1.10918
596.758	1.12907
596.858	1.17532
596.958	1.14297
597.058	1.0585
597.158	0.97985
597.258	0.89559
597.358	0.949597
597.458	1.03213
597.558	1.06294
597.658	1.09641
597.758	1.15387
597.858	1.1896
597.958	1.10323
598.058	0.999817
598.158	0.993491
598.258	0.936528
598.358	0.82649
598.458	0.760094
598.558	0.756557
598.658	0.775578
598.758	0.764371
598.858	0.755335
598.958	0.726288
599.058	0.700466
599.158	0.65135
599.258	0.675555
599.358	0.720248
599.458	0.766185
599.558	0.867423
599.658	0.91417
599.758	0.901688
599.858	0.839111
599.958	0.740691
600.058	0.712715
600.158	0.604976
600.258	0.523114
600.358	0.50064
600.458	0.505701
600.558	0.525113
600.658	0.56522
600.758	0.698822
600.858	0.87148
600.958	0.994022
601.058	0.984551
601.158	0.935778
601.258	0.941611
601.358	0.89606
601.458	0.792634
601.558	0.755766
601.658	0.773214
601.758	0.7539
601.858	0.722299
601.958	0.73995
602.058	0.849021
602.158	0.83097
602.258	0.80201
602.358	0.927477
602.458	1.0116
602.558	0.964271
602.658	0.87424
602.758	0.838925
602.858	0.880069
[truncated: 2,772 more rows]

## Sheet: Stable_Isotope_data_NACP_core
Strat_NACP_core(feet)	Strat_NACP_core(m)	d13C_av(permille_VPDB)	d18O_av(permille_VPDB)
1002	305.41	0.458587	-4.31828
1005	306.324	0.448034	-4.20143
1008	307.238	0.350977	-4.20086
1011	308.153	0.410551	-3.92872
1014	309.067	-0.00793441	-4.43684
1017	309.982	0.61151	-3.91653
1020	310.896	0.605115	-3.62723
1023	311.81	0.200371	-4.13836
1026	312.725	0.0372759	-4.42593
1029	313.639	-0.196841	-3.91241
1032	314.554	0.213109	-3.99887
1035	315.468	0.281913	-3.98254
1038	316.382	0.15283	-4.14846
1041	317.297	0.206003	-3.90457
1044	318.211	0.662523	-3.81239
1047	319.126	0.498582	-3.73964
1053	320.954	-0.00788454	-4.64302
1056	321.869	-0.369204	-4.69867
1059	322.783	0.0214101	-4.01552
1062	323.698	-0.0963497	-3.99354
1065	324.612	-0.054672	-4.23578
1068	325.526	-0.048458	-3.56082
1071	326.441	0.104886	-3.98161
1074	327.355	0.0744659	-4.26077
1077	328.27	0.00587764	-4.18519
1080	329.184	0.15359	-3.91328
1083	330.098	-0.437472	-4.72763
1086	331.013	-0.159944	-4.23615
1089	331.927	0.00364738	-4.58012
1092	332.842	0.025025	-4.37667
1095	333.756	0.0355916	-4.42973
1098	334.67	-0.00368675	-4.22998
1101	335.585	0.0394505	-4.4249
1104	336.499	-0.00384084	-4.75727
1107	337.414	0.134735	-4.03107
1109	338.023	-0.465158	-4.65103
1112	338.938	-0.0186318	-4.45225
1114	339.547	-0.242339	-4.68126
1117	340.462	-0.210613	-4.88381
1120	341.376	-0.0617504	-4.38512
1123	342.29	-0.0828973	-4.45139
1126	343.205	-0.212273	-4.30023
1129	344.119	-0.100195	-4.40606
1132	345.034	0.0747294	-4.1397
1135	345.948	-0.150545	-4.53733
1138	346.862	-0.234059	-4.54201
1141	347.777	-0.246818	-4.9338
1144	348.691	-0.275382	-4.59013
1147	349.606	-0.0623716	-4.36432
1150	350.52	-0.172579	-4.05709
1153	351.434	-0.328338	-4.88979
1156	352.349	0.00299067	-4.29737
1159	353.263	-0.376384	-4.79998
1162	354.178	-0.185412	-4.52122
1165	355.092	0.0117471	-4.21544
1168	356.006	-0.203893	-4.52794
1171	356.921	-0.126951	-4.79567
1174	357.835	-0.194155	-4.6911
1177	358.75	-0.46587	-4.31501
1180	359.664	-0.144643	-4.58521
1183	360.578	0.0217824	-4.41801
1186	361.493	-0.248175	-4.73395
1189	362.407	-0.0988548	-4.55229
1192	363.322	0.0601899	-4.9206
1198	365.15	0.228349	-4.47041
1201	366.065	-0.130771	-4.45255
1204	366.979	0.0347988	-4.74164
1207	367.894	0.0750603	-4.47565
1210	368.808	-0.0830832	-4.74323
1213	369.722	-0.105919	-4.717
1216	370.637	-0.0314076	-4.71884
1219	371.551	0.0638339	-4.31467
1222	372.466	-0.0179107	-4.47164
1225	373.38	-0.10933	-4.46112
1228	374.294	0.101148	-4.64519
1231	375.209	-0.0552538	-4.71994
1234	376.123	-0.0189034	-4.72991
1237	377.038	0.0475434	-4.42116
1240	377.952	0.117073	-4.41525
1243	378.866	-0.0230697	-4.464
1246	379.781	0.0575304	-4.4703
1249	380.695	-0.0985857	-4.58484
1252	381.61	-0.00201099	-4.57514
1255	382.524	0.0433877	-4.60722
1258	383.438	-0.0279778	-4.93518
1261	384.353	0.0214153	-4.46345
1264	385.267	-0.0303815	-4.61675
1267	386.182	-0.0598869	-4.61759
1270	387.096	0.321623	-4.50686
1273	388.01	0.445371	-4.41672
1276	388.925	0.213487	-4.96994
1279	389.839	0.173717	-4.81353
1282	390.754	-0.362728	-4.5901
1285	391.668	-0.614088	-4.55933
1288	392.582	-0.179887	-4.84614
1291	393.497	-0.185848	-4.94688
1294	394.411	-0.0358688	-4.87118
1297	395.326	-0.0186045	-4.77324
1300	396.24	-0.115836	-4.60702
1303	397.154	-0.305663	-4.5885
1306	398.069	-0.170662	-4.45072
1309	398.983	-0.0245511	-4.50522
1312	399.898	-0.455733	-4.7715
1315	400.812	-0.523728	-4.85952
1318	401.726	-0.113367	-4.87947
1321	402.641	-0.109969	-4.79231
1324	403.555	-0.0524895	-4.42368
1327	404.47	-0.184722	-4.84286
1330	405.384	-0.427806	-4.68836
1333	406.298	-0.0721661	-4.77456
1336	407.213	-0.465782	-4.74813
1339	408.127	-0.275674	-4.68973
1342	409.042	-0.154744	-4.41741
1345	409.956	-0.401018	-4.73263
1348	410.87	-0.486031	-4.69332
1351	411.785	-0.522292	-4.82569
1354	412.699	-0.528189	-5.06747
1357	413.614	-0.43643	-4.67965
1360	414.528	-0.787636	-4.75538
1363	415.442	-0.470484	-4.78272
1366	416.357	-0.512185	-4.66152
1369	417.271	-0.472361	-4.76038
1372	418.186	-0.563183	-4.84328
1375	419.1	-0.900312	-5.14983
1378	420.014	-0.271426	-4.62922
1381	420.929	-0.407291	-4.99993
1384	421.843	-0.216508	-4.6824
1387	422.758	-0.478248	-4.48019
1390	423.672	-0.624237	-4.8152
1393	424.586	-0.984475	-4.96036
1399	426.415	-0.380929	-4.75754
1402	427.33	-0.163344	-4.52786
1405	428.244	-0.258667	-4.60049
1408	429.158	-0.359497	-5.00467
1419	432.511	-0.696396	-5.06902
1424	434.035	-0.409782	-4.94101
1429	435.559	-0.476854	-5.11601
1434	437.083	-0.492828	-4.98512
1439	438.607	-0.729869	-5.24876
1444	440.131	-0.633259	-5.06337
1449	441.655	-0.715712	-5.20138
1454	443.179	-0.845143	-4.6836
1459	444.703	-0.677865	-4.95489
1464	446.227	-0.566924	-5.2111
1469	447.751	-0.651126	-5.23345
1474	449.275	-0.433305	-4.81921
1479	450.799	-0.504856	-4.918
1484	452.323	-0.40161	-5.08005
1489	453.847	-0.627173	-4.97189
1494	455.371	-0.470531	-4.44896
1496	455.981	-0.61549	-5.45378
1499	456.895	-0.595665	-4.79745
1504	458.419	-0.356306	-5.07471
1509	459.943	-0.349604	-4.86374
1514	461.467	-0.40434	-4.84153
1519	462.991	-1.30539	-4.39061
1524	464.515	-0.55149	-5.06554
1529	466.039	-0.414436	-4.94913
1534	467.563	-0.158716	-4.63208
1539	469.087	-0.457444	-5.00973
1544	470.611	-0.516172	-4.91575
1549	472.135	-0.506701	-4.57374
1554	473.659	-0.519303	-5.02288
1559	475.183	-0.397783	-4.91554
1564	476.707	-0.358535	-4.76832
1569	478.231	-0.625888	-4.89292
1574	479.755	-0.632404	-4.99441
1579	481.279	-0.531144	-4.89117
1584	482.803	-0.241305	-4.46682
1587	483.718	-0.319696	-4.88477
1590	484.632	-0.145667	-4.51753
1593	485.546	-1.06579	-4.69898
1596	486.461	-0.704614	-4.92002
1599	487.375	-0.363438	-4.57397
1602	488.29	-0.549306	-4.88571
1605	489.204	-0.487796	-5.00275
1608	490.118	-0.0357041	-4.84262
1611	491.033	0.0741541	-4.43885
1614	491.947	-0.248086	-4.81232
1620	493.776	-0.46792	-5.11989
1623	494.69	-0.215515	-4.77554
1626	495.605	-0.329867	-4.6861
1629	496.519	0.0479102	-4.87761
1632	497.434	0.18105	-4.48689
1635	498.348	-0.211935	-4.72588
1638	499.262	-0.910695	-5.06301
1641	500.177	0.0367296	-4.73528
1644	501.091	-0.124343	-5.08553
1647	502.006	0.00290197	-4.80966
1650	502.92	-0.136662	-5.07604
1653	503.834	-0.246709	-5.11192
1656	504.749	-0.536214	-4.97265
1659	505.663	-0.495051	-4.94603
1662	506.578	-0.537655	-4.46493
1665	507.492	-0.517088	-5.26031
1668	508.406	-0.379651	-4.91814
1671	509.321	-0.564114	-5.42977
1674	510.235	-0.413749	-4.91896
1680	512.064	-0.280636	-4.89983
1683	512.978	-0.34315	-4.90663
1686	513.893	-0.422856	-4.95706
1689	514.807	-0.432583	-5.06349
1692	515.722	-0.524169	-5.53511
1695	516.636	-0.45245	-4.51511
1698	517.55	-0.469075	-5.15883
1701	518.465	-0.381148	-4.94244
1704	519.379	0.197746	-4.26932
1707	520.294	-0.0306926	-4.84316
1710	521.208	0.109796	-4.37457
1713	522.122	-0.523391	-4.90893
1716	523.037	0.029473	-4.80404
1719	523.951	-0.314471	-5.30227
1722	524.866	-0.503273	-4.91887
1725	525.78	-0.420187	-5.2601
1728	526.694	-0.174707	-4.44562
1731	527.609	-0.450101	-4.68947
1734	528.523	0.0484392	-4.57327
1737	529.438	-0.885014	-4.87642
1740	530.352	-0.565074	-5.00491
1743	531.266	-0.0471219	-4.60997
1746	532.181	0.0843828	-4.95218
1749	533.095	-0.260343	-5.01435
1752	534.01	-0.444059	-4.8042
1755	534.924	0.104824	-4.754
1758	535.838	-0.207498	-5.17401
1761	536.753	-0.605445	-5.12926
1764	537.667	-0.407002	-4.87735
1767	538.582	-0.260281	-4.76158
1770	539.496	0.0101742	-4.5438
1773	540.41	-0.0975297	-5.04152
1776	541.325	-0.3276	-4.82545
1779	542.239	-0.460274	-4.89036
1782	543.154	-0.434328	-5.1281
1788	544.982	-0.682611	-4.60063
1791	545.897	-0.812118	-4.7673
1794	546.811	-0.499486	-4.86845
1797	547.726	0.0428228	-4.88582
1800	548.64	-0.260448	-4.61344
1803	549.554	-0.277926	-4.76869
1806	550.469	-1.10854	-4.78279
1809	551.383	-1.52466	-4.90407
1812	552.298	-1.29445	-5.15366
1815	553.212	-0.316419	-5.02661
1818	554.126	-0.113469	-4.51024
1821	555.041	-1.16403	-5.29984
1824	555.955	-1.55421	-4.64112
1827	556.87	-0.306109	-5.05684
1830	557.784	-0.320222	-5.1404
1833	558.698	0.0937883	-4.69735
1836	559.613	-0.164212	-4.85035
1839	560.527	-0.056587	-4.41599
1842	561.442	-0.699788	-4.56369
1845	562.356	0.298807	-4.20426
1848	563.27	-0.379749	-4.44306
1851	564.185	-0.298778	-4.97013
1854	565.099	-0.806247	-4.19538
1857	566.014	-0.973551	-4.90349
1860	566.928	-1.12758	-4.79183
1863	567.842	-0.426309	-4.72359
1866	568.757	-0.249427	-5.54261
1869	569.671	-0.0503892	-4.6941
1872	570.586	-0.282937	-4.90566
1875	571.5	-0.463376	-4.82448
1878	572.414	-0.54871	-4.27208
1881	573.329	0.126224	-4.7169
1884	574.243	-1.25928	-4.94963
1887	575.158	-1.24094	-4.74811
1890	576.072	-1.02392	-4.86014
1893	576.986	-1.29954	-4.44084
1896	577.901	-0.893022	-5.07419
1898	578.51	-1.27013	-4.88164
1899	578.815	-0.332423	-4.77943
1902	579.73	0.112047	-4.51688
1908	581.558	-1.3606	-4.29439
1911	582.473	-2.02949	-4.57444
1917	584.302	-3.76159	-4.3734
1923	586.13	-1.85432	-4.92911
1926	587.045	-0.959699	-5.43035
1929	587.959	-0.300244	-4.48337
1932	588.874	-0.503117	-4.3089
1935	589.788	-1.78389	-4.20823
1938	590.702	-0.483962	-4.5932
1941	591.617	-0.274594	-4.51986
1944	592.531	-0.665808	-4.78407
1947	593.446	-0.0464076	-4.80616
1950	594.36	-0.441309	-4.66344
1953	595.274	-0.489742	-4.90865
1956	596.189	-0.400841	-4.8391
1959	597.103	-0.595853	-4.93682
1962	598.018	-0.301127	-4.64243
1965	598.932	-0.545358	-5.5888
1968	599.846	-0.389205	-4.57744
1971	600.761	0.107207	-4.42837
1974	601.675	-0.242475	-4.76072
1977	602.59	-0.00671361	-4.32951
1980	603.504	-0.5819	-4.79683
1983	604.418	-0.194223	-4.04729
1985	605.028	-0.158088	-4.42755
1989	606.247	0.0906296	-4.55107
1992	607.162	-0.630918	-4.28816
1995	608.076	-0.0901246	-5.1191
2004	610.819	-0.638943	-4.79549
2007	611.734	-0.16008	-4.9327
2010	612.648	-0.154311	-4.58466
2013	613.562	-0.11747	-4.84312
2016	614.477	-0.192502	-5.0067
2025	617.22	-0.0633578	-5.03489
2028	618.134	-0.0746285	-4.51503
2031	619.049	0.0879319	-4.43458
2034	619.963	0.277778	-4.64802
2035	620.268	0.333307	-4.56266
2037	620.878	0.454919	-4.67939
2040	621.792	0.010269	-4.77366
2043	622.706	0.0371685	-4.70507
2046	623.621	-0.160015	-4.87886
2049	624.535	0.175604	-4.23892
2052	625.45	0.093725	-4.78586
2055	626.364	-0.000878975	-4.56666
2058	627.278	0.407526	-4.85537
2061	628.193	0.168769	-4.86245
2064	629.107	0.686341	-4.31214
2067	630.022	0.51808	-5.02083
2070	630.936	0.265938	-4.89833
2076	632.765	0.242076	-5.12704
2079	633.679	0.511022	-4.37141
2082	634.594	0.451909	-4.54616
2085	635.508	0.38548	-4.64352
2088	636.422	0.1769	-4.80935
2091	637.337	0.62351	-4.79558
2094	638.251	0.449713	-5.2317
2097	639.166	0.313223	-4.86347
2100	640.08	0.270055	-4.65085
2103	640.994	0.459684	-4.86804
2106	641.909	0.296199	-4.13808
2109	642.823	0.594752	-4.32464
2112	643.738	0.511253	-4.46317
2115	644.652	0.617217	-4.25711
2118	645.566	0.69426	-4.90438
2121	646.481	0.622207	-4.91833
2124	647.395	0.653288	-4.49048
2127	648.31	0.789227	-4.7981
2130	649.224	0.560219	-5.13063
2133	650.138	0.475229	-5.21085
2136	651.053	0.44224	-5.12631
2139	651.967	0.431741	-4.37625
2142	652.882	0.40618	-4.99784
2145	653.796	0.298217	-4.9965
2148	654.71	0.335436	-4.87784
2151	655.625	0.193205	-5.16011
2154	656.539	0.310771	-4.84303
2157	657.454	0.435242	-4.7553
2160	658.368	-1.40788	-4.91267
2163	659.282	0.493276	-4.77243
2166	660.197	-2.83393	-4.08583
2169	661.111	-0.104289	-5.13528
2172	662.026	-0.413759	-5.38578
2175	662.94	0.461252	-4.95228
2178	663.854	0.231229	-4.36013
2181	664.769	0.604274	-5.01019
2184	665.683	0.69608	-4.17867
2187	666.598	0.815578	-4.71627
2190	667.512	0.598533	-4.82933
2193	668.426	0.604081	-4.87803
2196	669.341	0.536935	-4.82228
2199	670.255	0.64901	-4.79664
2202	671.17	0.506102	-4.95539
2205	672.084	0.599747	-4.99127
2208	672.998	0.536389	-5.01801
2211	673.913	0.655727	-5.04626
2214	674.827	0.674543	-5.11491
2217	675.742	0.598675	-4.95914
2220	676.656	0.558559	-5.70691
2223	677.57	0.642107	-4.88195
2224	677.875	0.852214	-5.07505
2226	678.485	0.965452	-5.01151
2229	679.399	1.00945	-4.93175
2235	681.228	0.945162	-4.94397
2241	683.057	0.903238	-5.31169
2247	684.886	0.898395	-4.76679
2250	685.8	0.778295	-4.8669
2253	686.714	0.90045	-4.95078
2256	687.629	0.669506	-4.88513
2259	688.543	0.778594	-5.04655
2262	689.458	0.537346	-4.96246
2265	690.372	0.0504719	-5.0927
2265	690.372	0.0789494	-5.14407
2268	691.286	0.859987	-4.5899
2271	692.201	0.693345	-5.07932
2274	693.115	0.298287	-5.14125
2277	694.03	0.89847	-5.18194
2280	694.944	0.964057	-5.35511
2283	695.858	0.883396	-4.95563
2286	696.773	0.850278	-5.19034
2289	697.687	1.08585	-4.98824
2292	698.602	1.1423	-5.05853
2295	699.516	1.03725	-4.8406
2298	700.43	1.00891	-5.09329
2301	701.345	1.04761	-4.97191
2304	702.259	1.04188	-5.11653
2307	703.174	0.504581	-4.86996
2310	704.088	1.29597	-4.54885
2313	705.002	1.01737	-5.25162
2316	705.917	1.06839	-4.88438
2319	706.831	1.12427	-5.0733
2322	707.746	1.06031	-5.13167
2325	708.66	1.06441	-4.92047
2328	709.574	0.880699	-5.0668
2331	710.489	0.526585	-4.51517
2334	711.403	0.567438	-3.91231
2337	712.318	-0.421854	-3.42617
2340	713.232	0.64788	-2.90122
2342	713.842	1.08554	-3.88647
2346	715.061	0.867263	-4.15739
2349	715.975	1.19721	-4.05591
2352	716.89	-0.26198	-4.53538
2355	717.804	0.623147	-3.38105
2358	718.718	0.884715	-3.49171
2361	719.633	1.35138	-3.27884
2364	720.547	0.786952	-3.97259
2367	721.462	1.11996	-3.70497
2370	722.376	-2.62478	-4.02054
2373	723.29	0.306422	-4.15478
2376	724.205	0.420134	-4.09215
2379	725.119	1.02939	-3.80855
2382	726.034	1.39555	-4.0214
2385	726.948	1.35744	-4.15065
2388	727.862	1.13158	-3.67622
2391	728.777	1.26007	-3.82717
2394	729.691	1.04054	-3.56676
2397	730.606	1.23678	-4.28648
2400	731.52	1.26537	-4.11451
2403	732.434	0.468936	-3.47455
2406	733.349	-0.117845	-4.21209
2409	734.263	1.24631	-4.69464
2412	735.178	1.13245	-2.97073
2415	736.092	1.15838	-4.04191
2418	737.006	1.30515	-4.51756
2421	737.921	1.09219	-4.02863
2424	738.835	0.904445	-4.8285
2427	739.75	0.922366	-4.57655
2430	740.664	0.71932	-3.97554
2433	741.578	0.923	-4.78223
2436	742.493	0.853493	-4.56521
2439	743.407	0.978253	-4.4622
2442	744.322	-0.43929	-4.06028
2443	744.626	-0.996545	-5.58501
2445	745.236	-1.55326	-4.76051
2451	747.065	-0.510454	-4.05988
2454	747.979	0.281708	-4.32529
2457	748.894	1.29923	-3.89701
2460	749.808	1.16415	-3.81536
2463	750.722	1.19389	-4.47964
2466	751.637	1.52702	-4.41964
2469	752.551	1.37506	-4.4141
2472	753.466	1.12474	-3.83451
2474	754.075	1.32813	-4.43448
2478	755.294	0.953294	-4.39221
2481	756.209	0.567499	-5.08104
2487	758.038	0.483084	-4.26655
2491	759.257	0.405223	-4.19631
2493	759.866	0.980507	-4.4295
2496	760.781	1.21169	-3.74712
2499	761.695	1.37823	-4.83668
2502	762.61	1.17425	-4.6364
2505	763.524	1.24778	-4.48882
2508	764.438	1.4449	-4.37154
2511	765.353	1.02642	-5.01939
2514	766.267	1.10269	-5.92375
2515.5	766.724	-3.92199	-6.21385
2517	767.182	0.951968	-4.71761
2520	768.096	1.18782	-4.30982

## Sheet: G49083
Sinnesael, M., et al., 2021, Precession-driven climate cycles and time scale prior to the Hirnantian glacial maximum: Geology, v. 49, https://doi.org/10.1130/G49083.1
